# Supplementary material for: A 1985–2023 time series dataset of absolute reservoir storage in Mainland Southeast Asia (MSEA-Res)
Source: Copernicus journal article supplement (doi:10.5194/essd-17-2693-2025), 2025-06-17
Supplement: Supplementary file 1 [file essd-17-2693-2025-supplement.pdf]

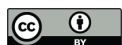

*Supplement of*

**A 1985–2023 time series dataset of absolute reservoir storage in Mainland Southeast Asia (MSEA-Res)**

**Shanti Shwarup Mahto et al.**

*Correspondence to:* Shanti Shwarup Mahto ([ssmahto.dgi@uj.ac.in](mailto:ssmahto.dgi@uj.ac.in), [ss.mahto@nus.edu.sg](mailto:ss.mahto@nus.edu.sg))

The copyright of individual parts of the supplement might differ from the article licence.

## Figures

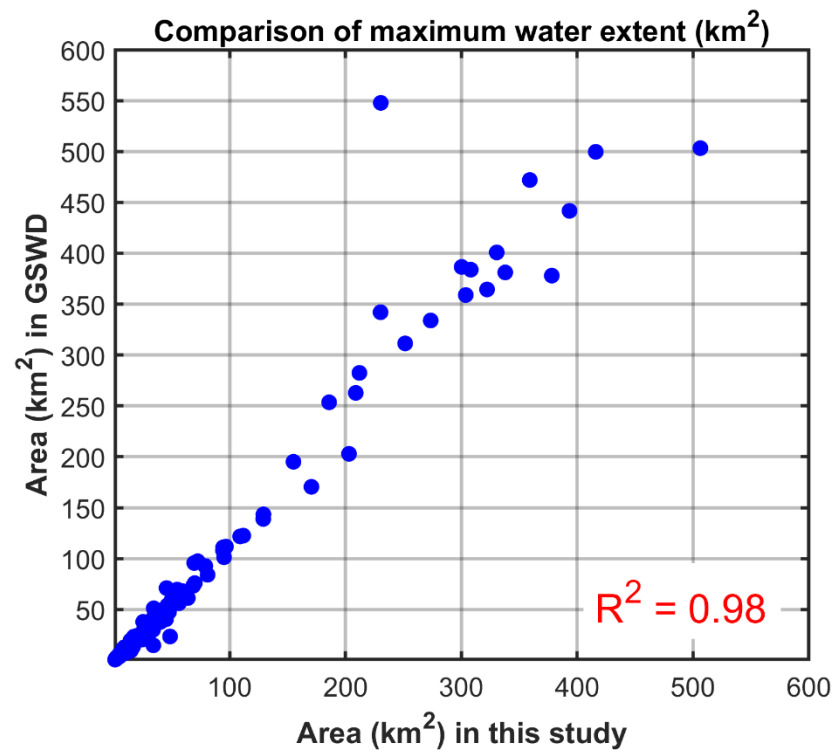

Figure S1. Comparison of maximum water extent with Global Surface Water Dataset (GSWD) for 186 reservoirs across Mainland Southeast Asia.

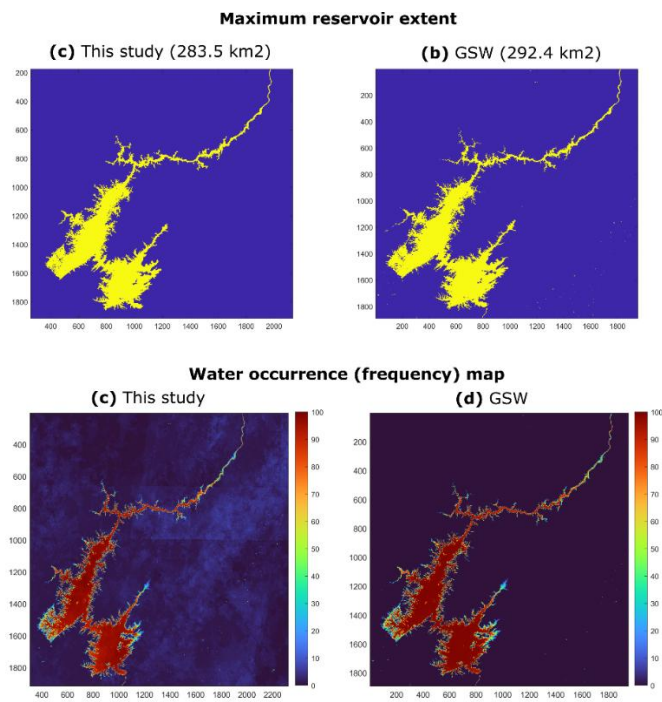

Figure S2. Comparison of maximum water extent and frequency maps with Global Surface Water Dataset (GSWD) for Sirikit reservoir.

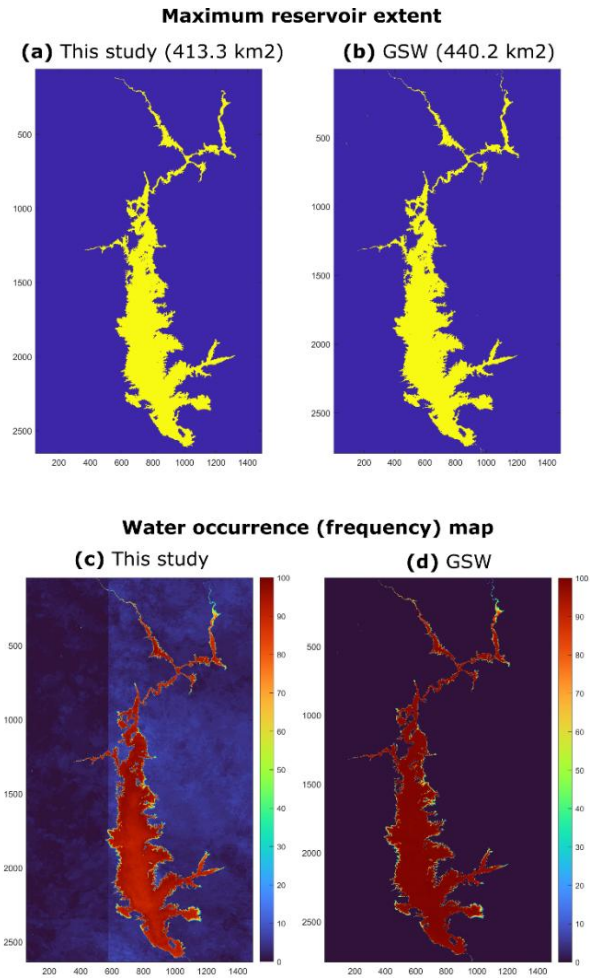

Figure S3. Comparison of maximum water extent and frequency maps with Global Surface Water Dataset (GSWD) for Srinagarind reservoir.

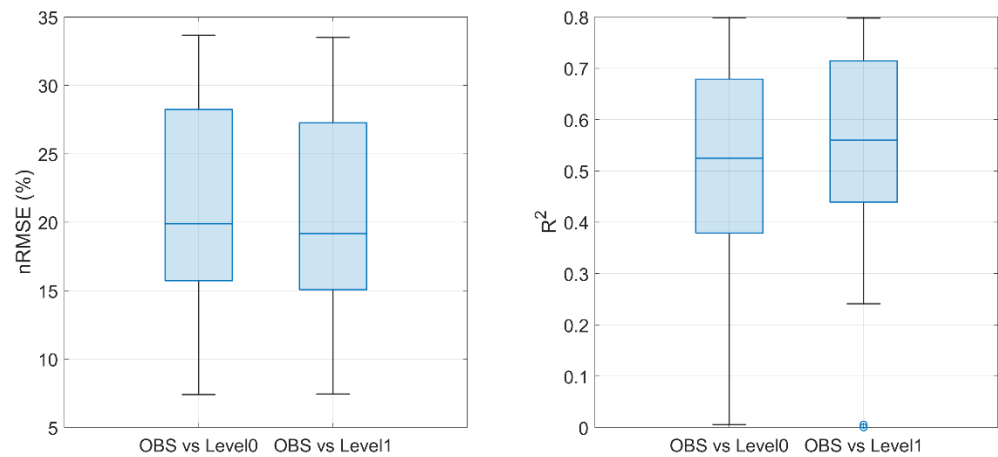

**Figure S4: nRMSE and R<sup>2</sup> between inferred (Level-0 and Level-1) and observed data. The nRMSE decreased and R<sup>2</sup> increased from Level-0 to Level-1, suggesting an improvement in the outlier removal approach.**

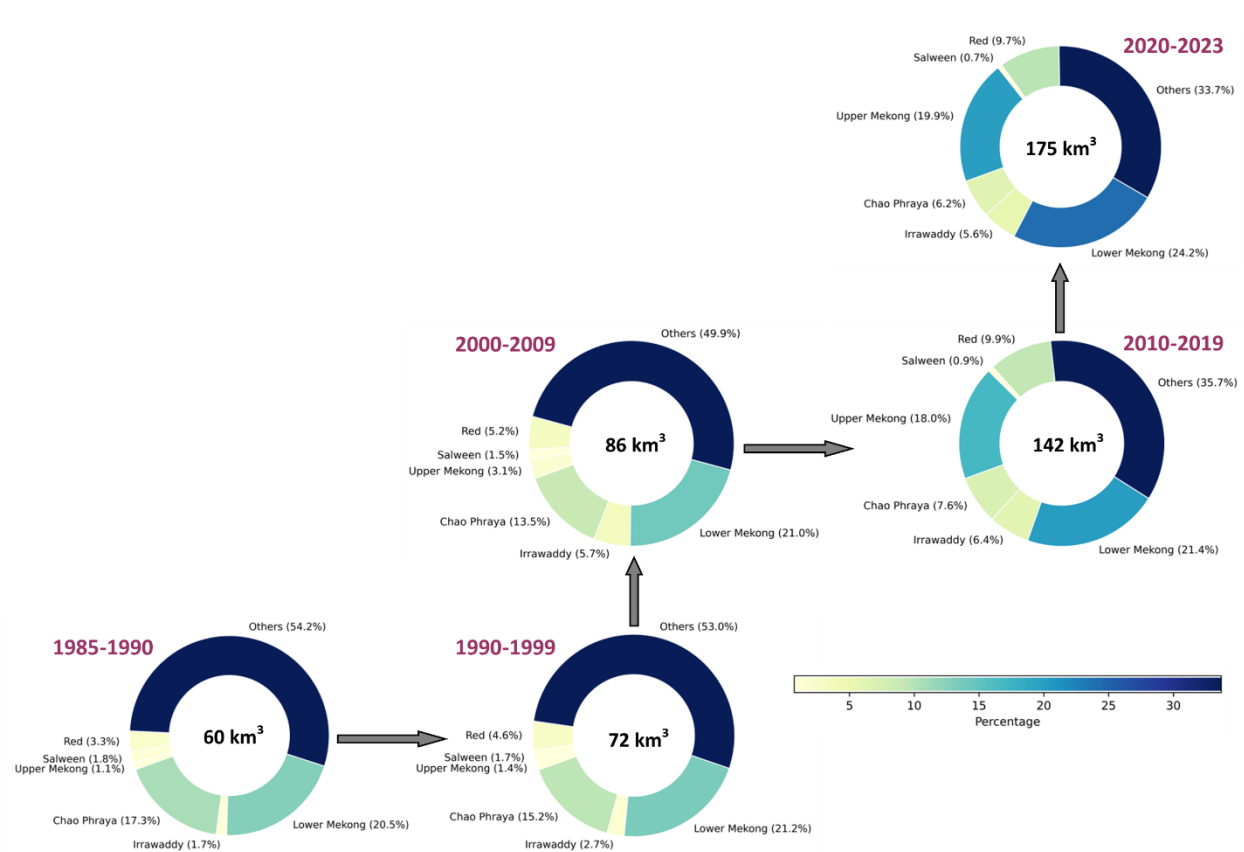

**Figure S5: Change in total reservoir storage in Mainland Southeast Asia between 1985 and 2023. The value at the center of each pie-chart shows the average reservoir storage in that period, while the color division represents the percentage contribution of reservoir storage from each major basin.**



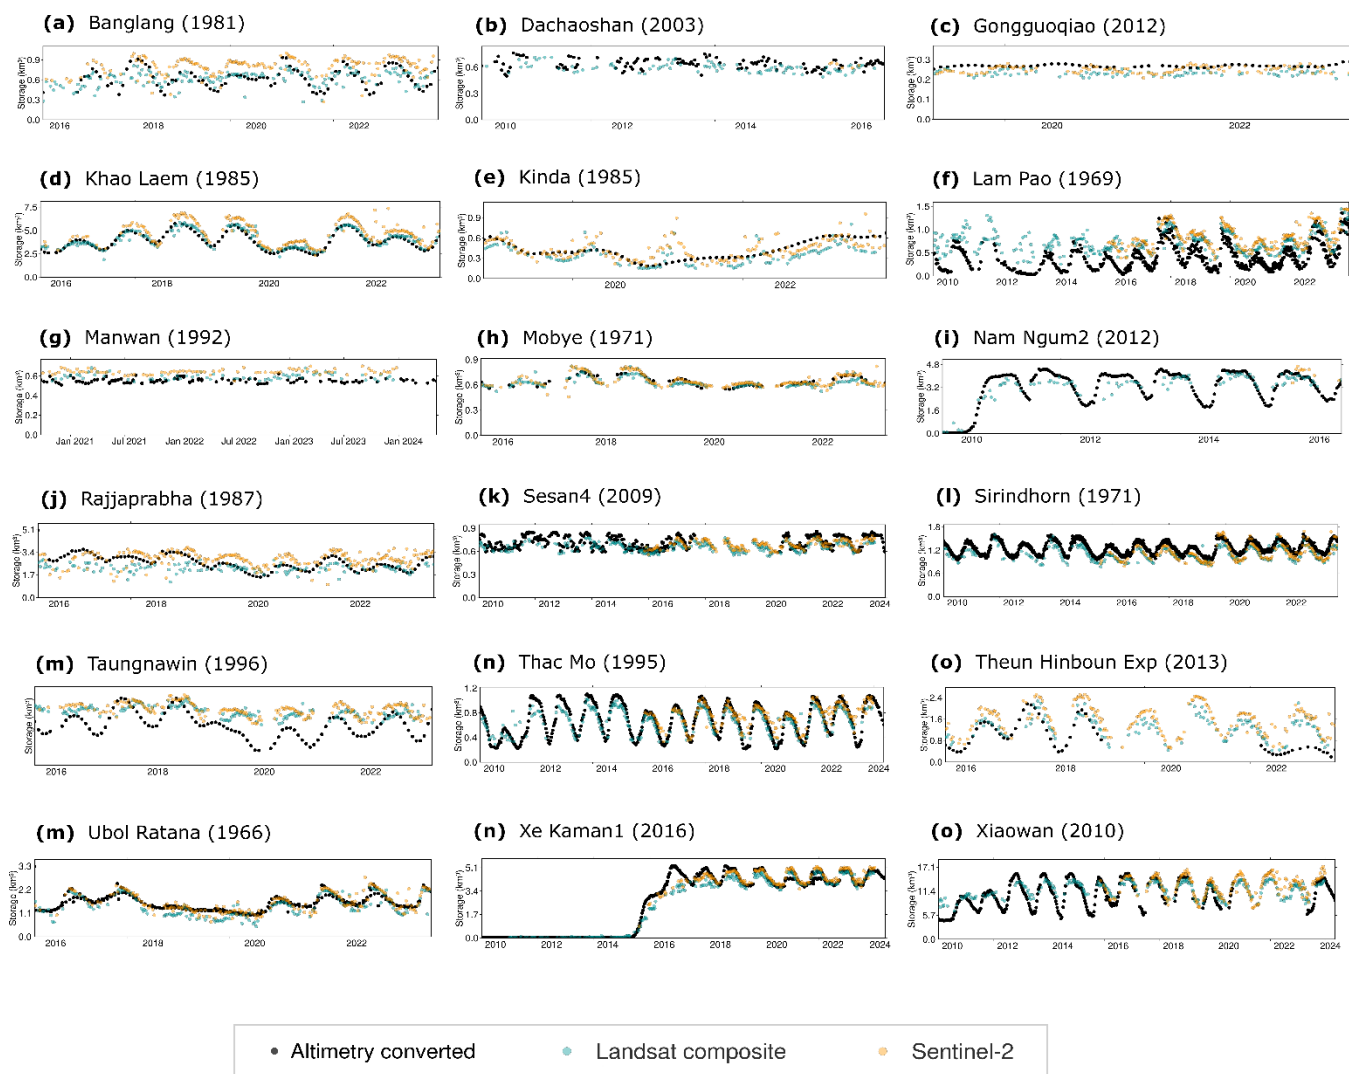

**Figure S7: Indirect validation of the storage time-series against altimetry-converted storage for eighteen different reservoirs across Mainland Southeast Asia.**

## **Tables**

**Table S1.** List of reservoirs used in the direct validation and corresponding validation performance. Note that the reservoirs are listed in decreasing order of  $R^2$ .

| <b>Name of the reservoir</b> | <b>Year of commission</b> | <b>Longitude</b> | <b>Latitude</b> | <b><math>R^2</math></b> | <b>nRMSE (%)</b> |
|------------------------------|---------------------------|------------------|-----------------|-------------------------|------------------|
| <b>Sirindhorn</b>            | 1971                      | 105.389          | 15.133          | 0.88                    | 14.36            |
| <b>Srinagarind</b>           | 1978                      | 99.0648          | 14.5122         | 0.8                     | 7.43             |
| <b>Ubol_Ratana</b>           | 1966                      | 102.587          | 16.758          | 0.8                     | 13.15            |
| <b>Sirikit</b>               | 1974                      | 100.5286         | 17.8078         | 0.79                    | 9.59             |
| <b>Lamphraphloeng</b>        | 1967                      | 101.785          | 14.537          | 0.78                    | 16.67            |
| <b>Khao_Laem</b>             | 1985                      | 98.52            | 14.8817         | 0.77                    | 18.19            |
| <b>Nam_Pung</b>              | 1965                      | 103.966          | 16.969          | 0.77                    | 20.75            |
| <b>Kaengkrachan</b>          | 1966                      | 99.6114          | 12.9032         | 0.75                    | 9.87             |
| <b>Tabsalao</b>              | 1988                      | 99.433           | 15.541          | 0.71                    | 16.1             |
| <b>Lam_Pao</b>               | 1969                      | 103.44           | 16.654          | 0.7                     | 16.91            |
| <b>Nam_Oun</b>               | 1973                      | 103.7467         | 17.2971         | 0.65                    | 10.31            |
| <b>Mae_Kuang</b>             | 1991                      | 99.1204          | 18.9294         | 0.59                    | 13.16            |
| <b>Lamtakhong</b>            | 1969                      | 101.535          | 14.821          | 0.58                    | 16.4             |
| <b>Mae_Ngat</b>              | 1985                      | 99.0382          | 19.1685         | 0.56                    | 33.5             |
| <b>Khun_Dan_Prakan_Chon</b>  | 2004                      | 101.3241         | 14.3071         | 0.53                    | 20.19            |
| <b>Pranburi</b>              | 1978                      | 99.7833          | 12.4615         | 0.48                    | 25.82            |
| <b>Chulabhorn</b>            | 1972                      | 101.636          | 16.539          | 0.4                     | 27.49            |
| <b>Bang_Lang</b>             | 1981                      | 101.271          | 6.146           | 0.24                    | 24.59            |
| <b>Rajjaprabha</b>           | 1987                      | 98.7664          | 9.004           | 0.01                    | 31.69            |
| <b>Bhumibol</b>              | 1964                      | 98.9024          | 17.2569         | 0                       | 27.52            |

**Table S2.** List of reservoirs used in the indirect validation and corresponding validation performance. Note that the reservoirs are listed in decreasing order of  $R^2$ .

| <b>Name of the reservoir</b> | <b>Year of commission</b> | <b>Longitude</b> | <b>Latitude</b> | <b><math>R^2</math></b> | <b>nRMSE (%)</b> |
|------------------------------|---------------------------|------------------|-----------------|-------------------------|------------------|
| <b>Xe_Kaman1</b>             | 2016                      | 107.174          | 14.97           | 0.97                    | 6.43             |
| <b>Nuozhadu</b>              | 2014                      | 100.37           | 22.676          | 0.96                    | 6.43             |
| <b>Theun_Hinboun_Exp</b>     | 2013                      | 104.66           | 18.315          | 0.95                    | 20.54            |
| <b>Khao_Laem</b>             | 1985                      | 98.52            | 14.8817         | 0.93                    | 8.02             |
| <b>Ubol_Ratana</b>           | 1966                      | 102.587          | 16.758          | 0.92                    | 5.3              |
| <b>Sirindhorn</b>            | 1971                      | 105.389          | 15.133          | 0.89                    | 11.07            |
| <b>Moby</b>                  | 1971                      | 97.0434          | 19.8716         | 0.87                    | 4.66             |
| <b>Thac_Mo</b>               | 1995                      | 107.0624         | 11.8406         | 0.79                    | 11.31            |
| <b>Lam_Pao</b>               | 1969                      | 103.44           | 16.654          | 0.78                    | 24.26            |
| <b>Xiaowan</b>               | 2010                      | 99.95            | 24.745          | 0.71                    | 14.36            |
| <b>Sesan4</b>                | 2009                      | 107.5064         | 13.975          | 0.7                     | 8.04             |
| <b>Sirikit</b>               | 1974                      | 100.5286         | 17.8078         | 0.68                    | 17.69            |
| <b>Taungnawin</b>            | 1996                      | 95.5858          | 18.9231         | 0.58                    | 29.07            |
| <b>Dachaoshan</b>            | 2003                      | 100.505          | 24.128          | 0.49                    | 10.53            |
| <b>Gongguoqiao</b>           | 2012                      | 99.331           | 25.589          | 0.47                    | 15.92            |
| <b>Kinda</b>                 | 1985                      | 96.3113          | 21.1581         | 0.35                    | 18.39            |
| <b>Bang_Lang</b>             | 1981                      | 101.271          | 6.146           | 0.28                    | 16.61            |
| <b>Nam_Ngum2</b>             | 2012                      | 102.797          | 18.846          | 0.12                    | 10.58            |
| <b>Rajjaprabha</b>           | 1987                      | 98.7664          | 9.004           | 0.1                     | 16               |
| <b>Manwan</b>                | 1992                      | 100.42           | 24.659          | 0                       | 12.05            |
